# Supplementary material for: RT-qPCR Assays for Rapid Detection of the N501Y, 69-70del, K417N, and E484K SARS-CoV-2 Mutations: A Screening Strategy to Identify Variants With Clinical Impact
Source: PubMed Central journal article supplement (PMC8195289; doi:10.3389/fcimb.2021.672562), 2021-05-20

# Sample 157231

T G A G A G A G A T A T T T C A A C T G A A A T C T A T C A G G C C G G T A G C A C A C C T T G T A A T G G T G T T A A A G G T T T A A T T G T T A C T T T C C T T T A C A A T C A T A T G G T T T C C A A C C C A C T A /

140 150 160 170 180 190 200 210 220 230 240

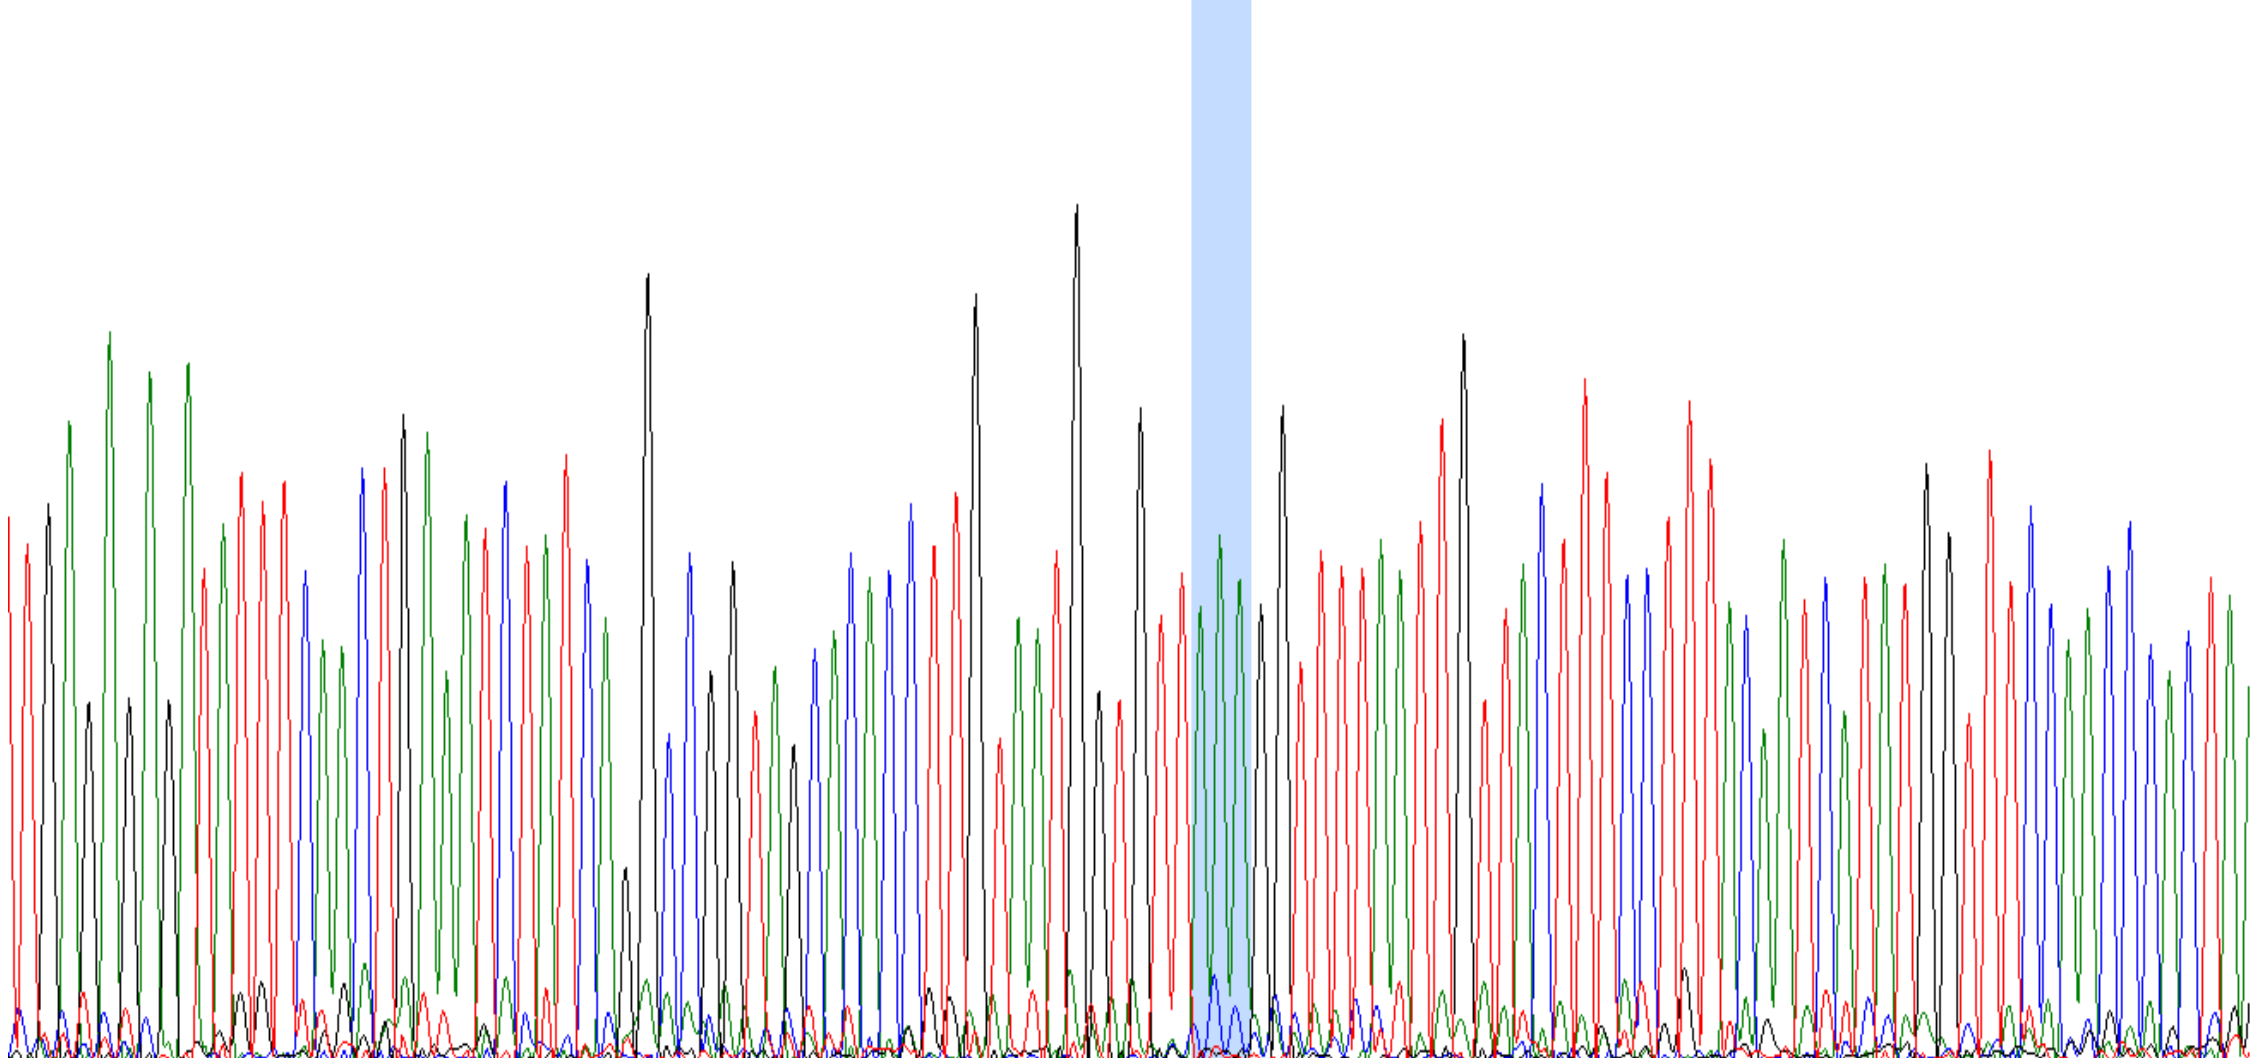

Sample E39931

T G A G A G A G A T A T T T C A A C T G A A A T C T A T C A G G C C G G T A G C A C A C C T T G T A A T G G T G T T A A A G G T T T A A T T G T A C T T T C C T T T A C A A T C A T A T G G T T T C C A A C C C A C T A A

140 150 160 170 180 190 200 210 220 230 240

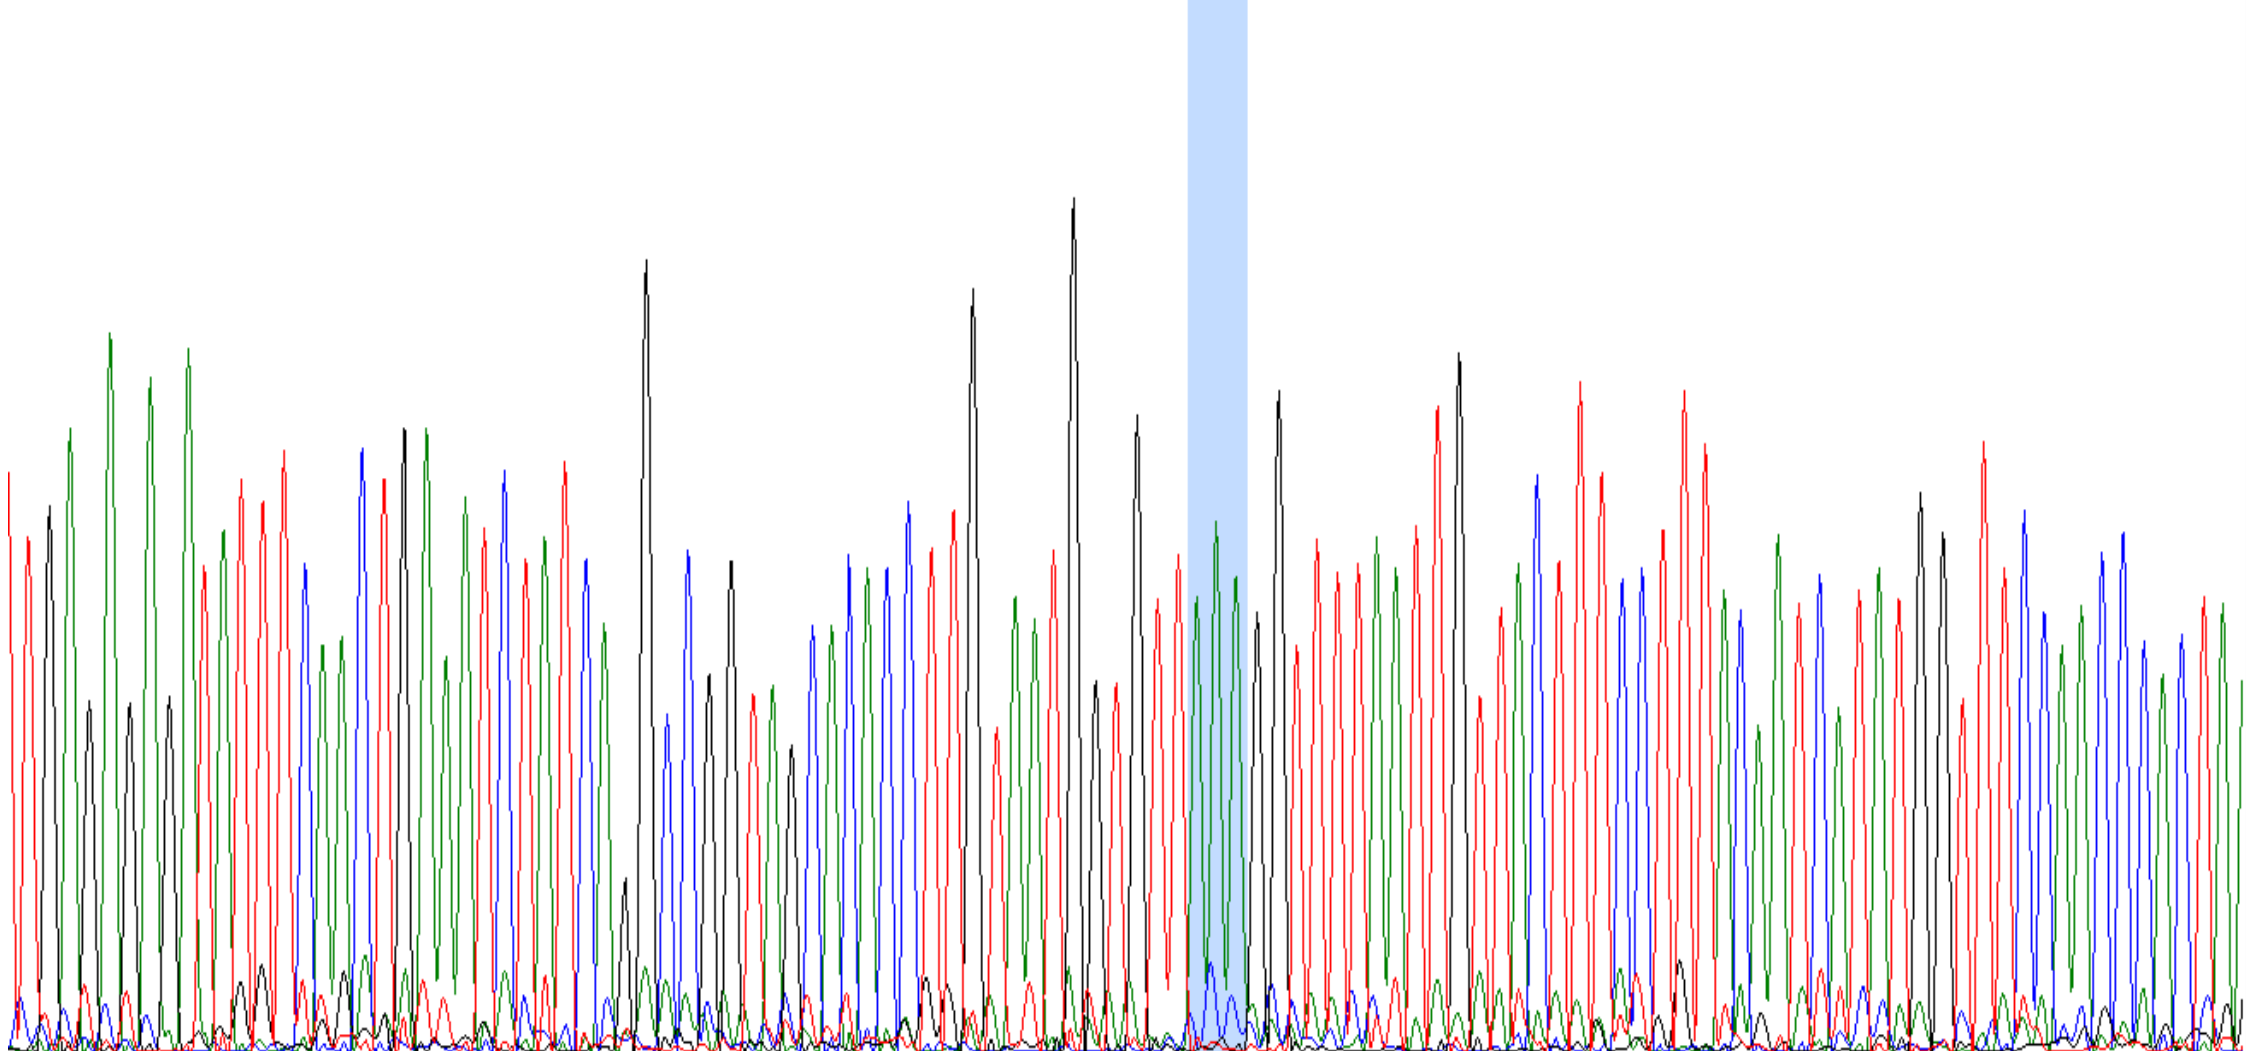

Sample 133706

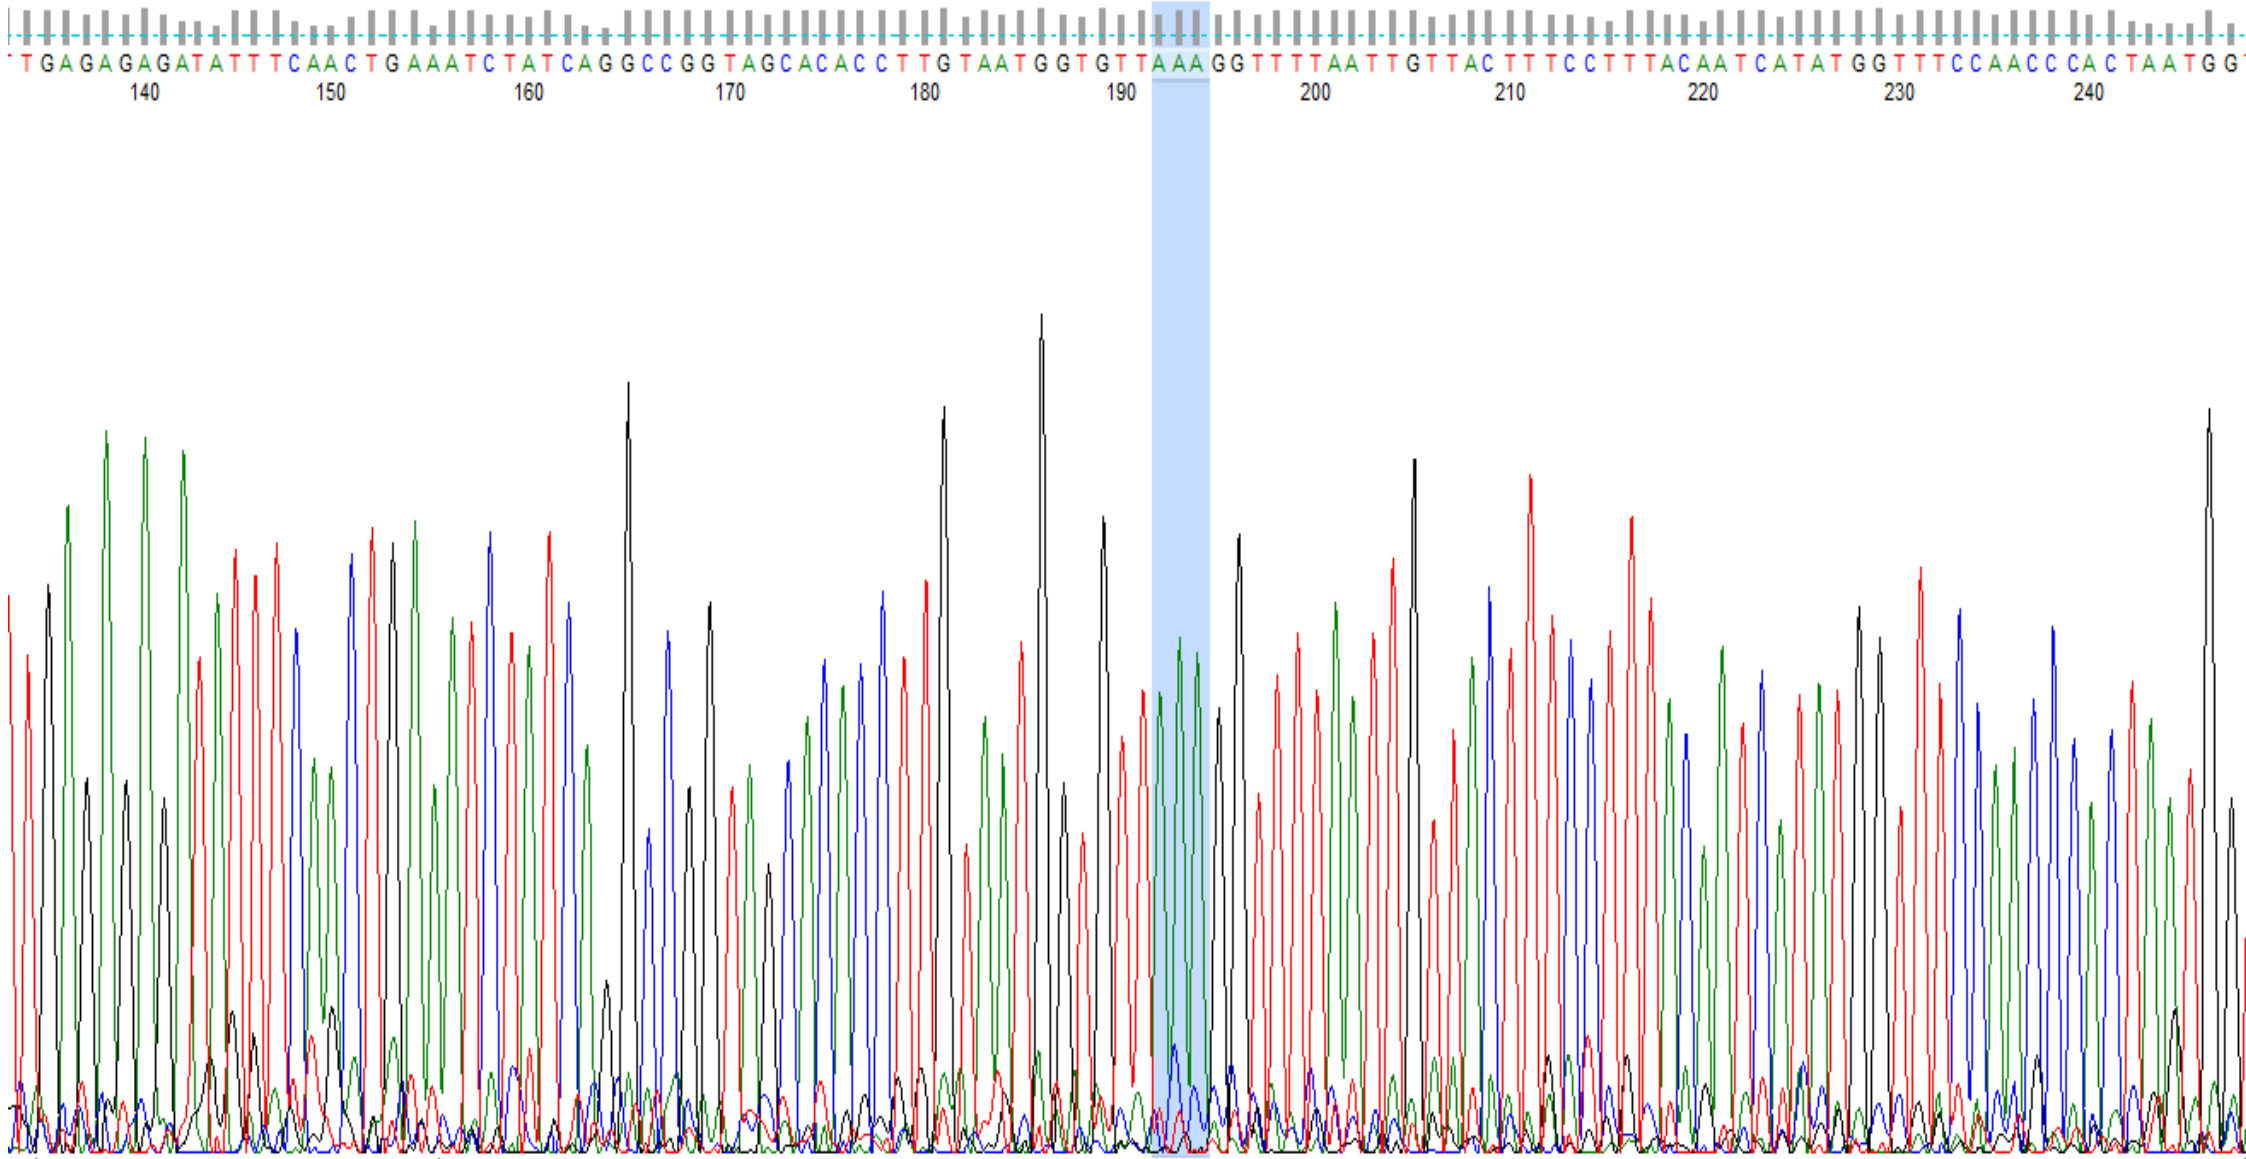

Sample 145365

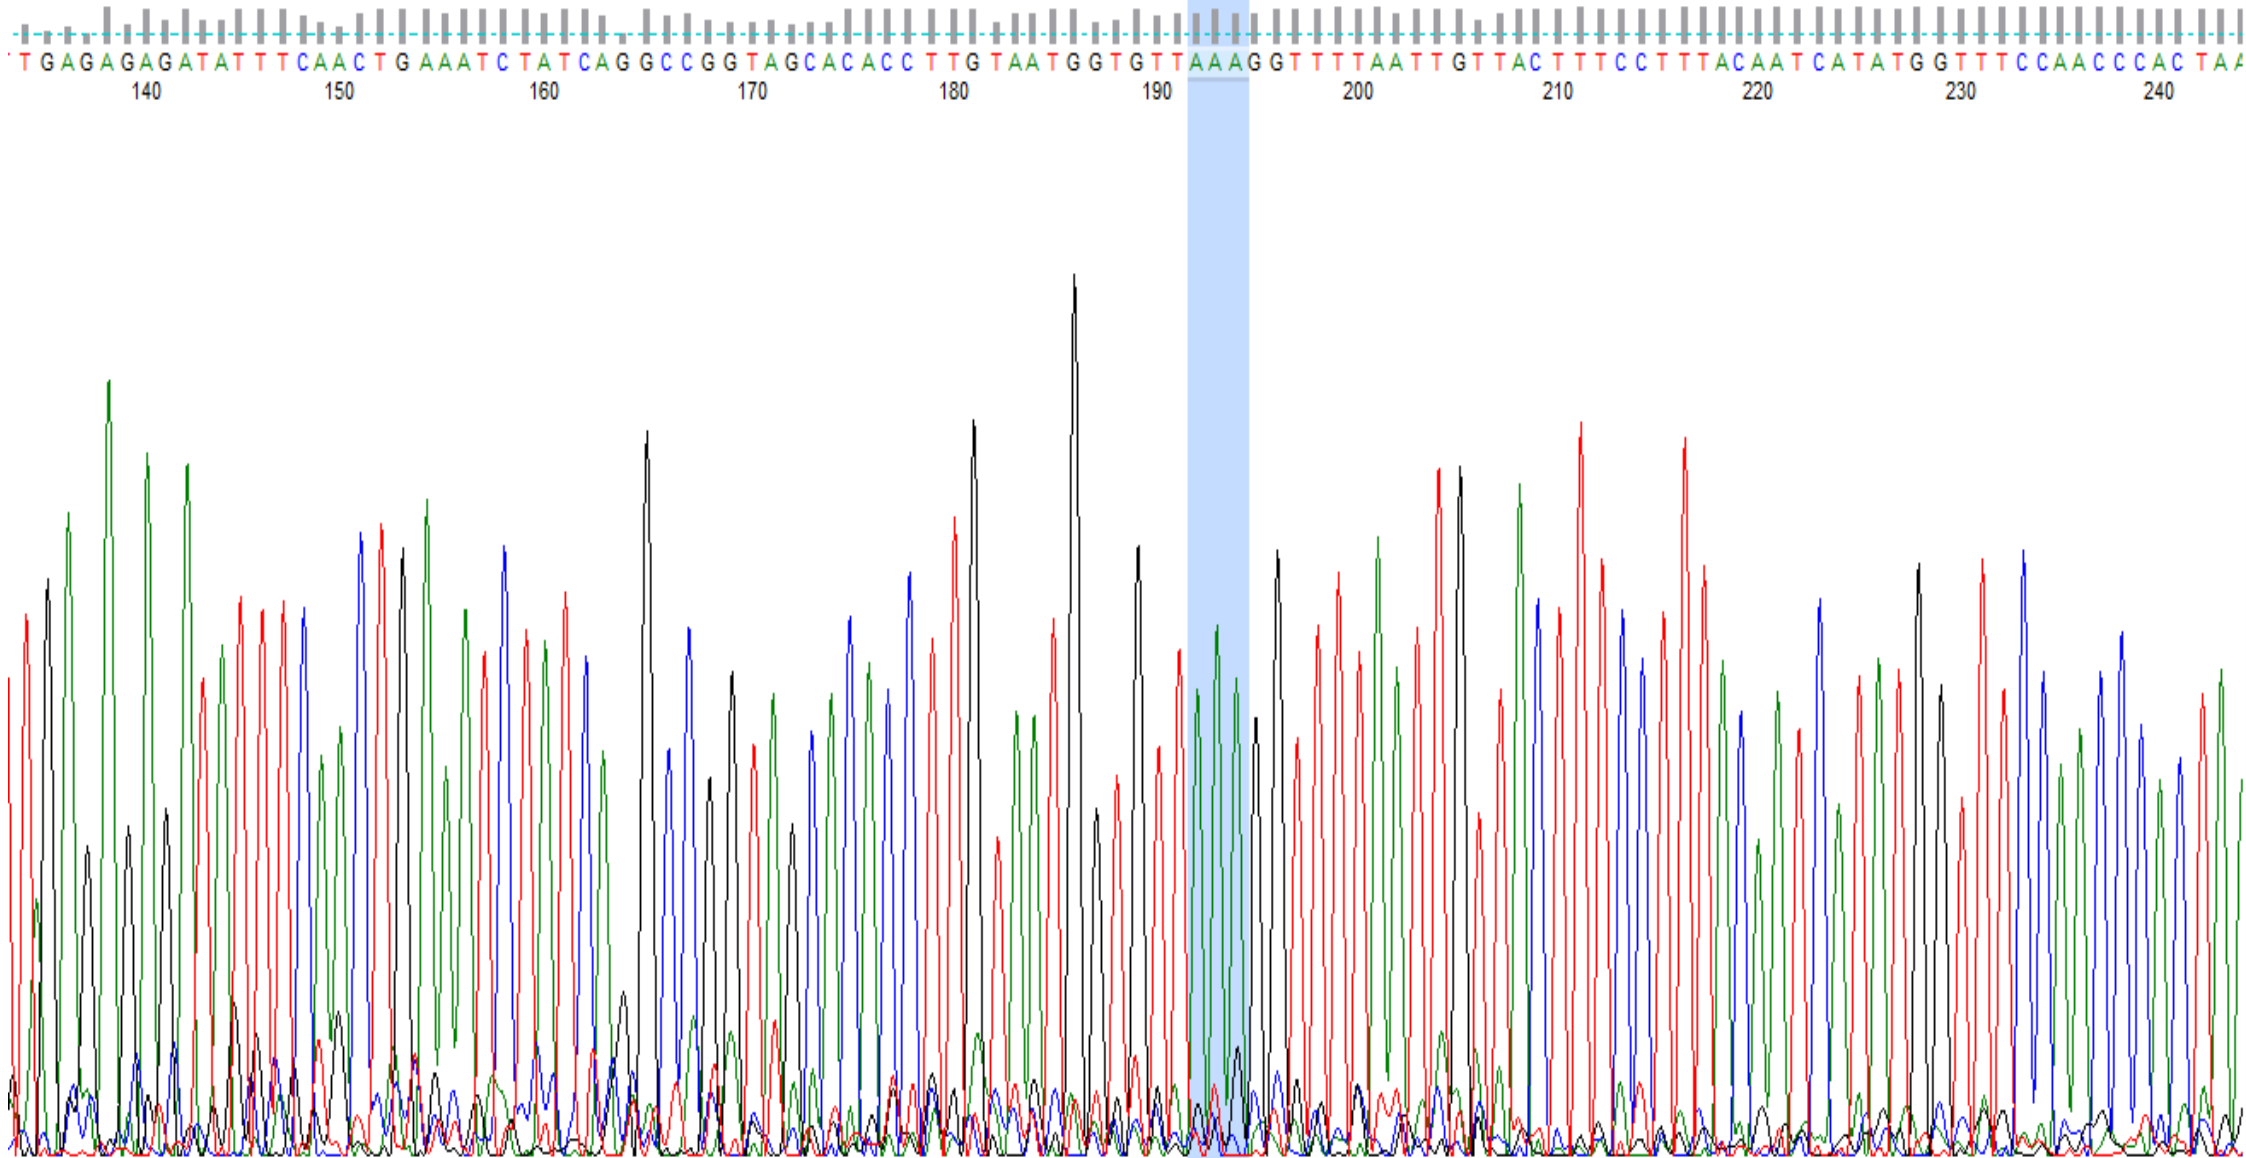

Sample 157218

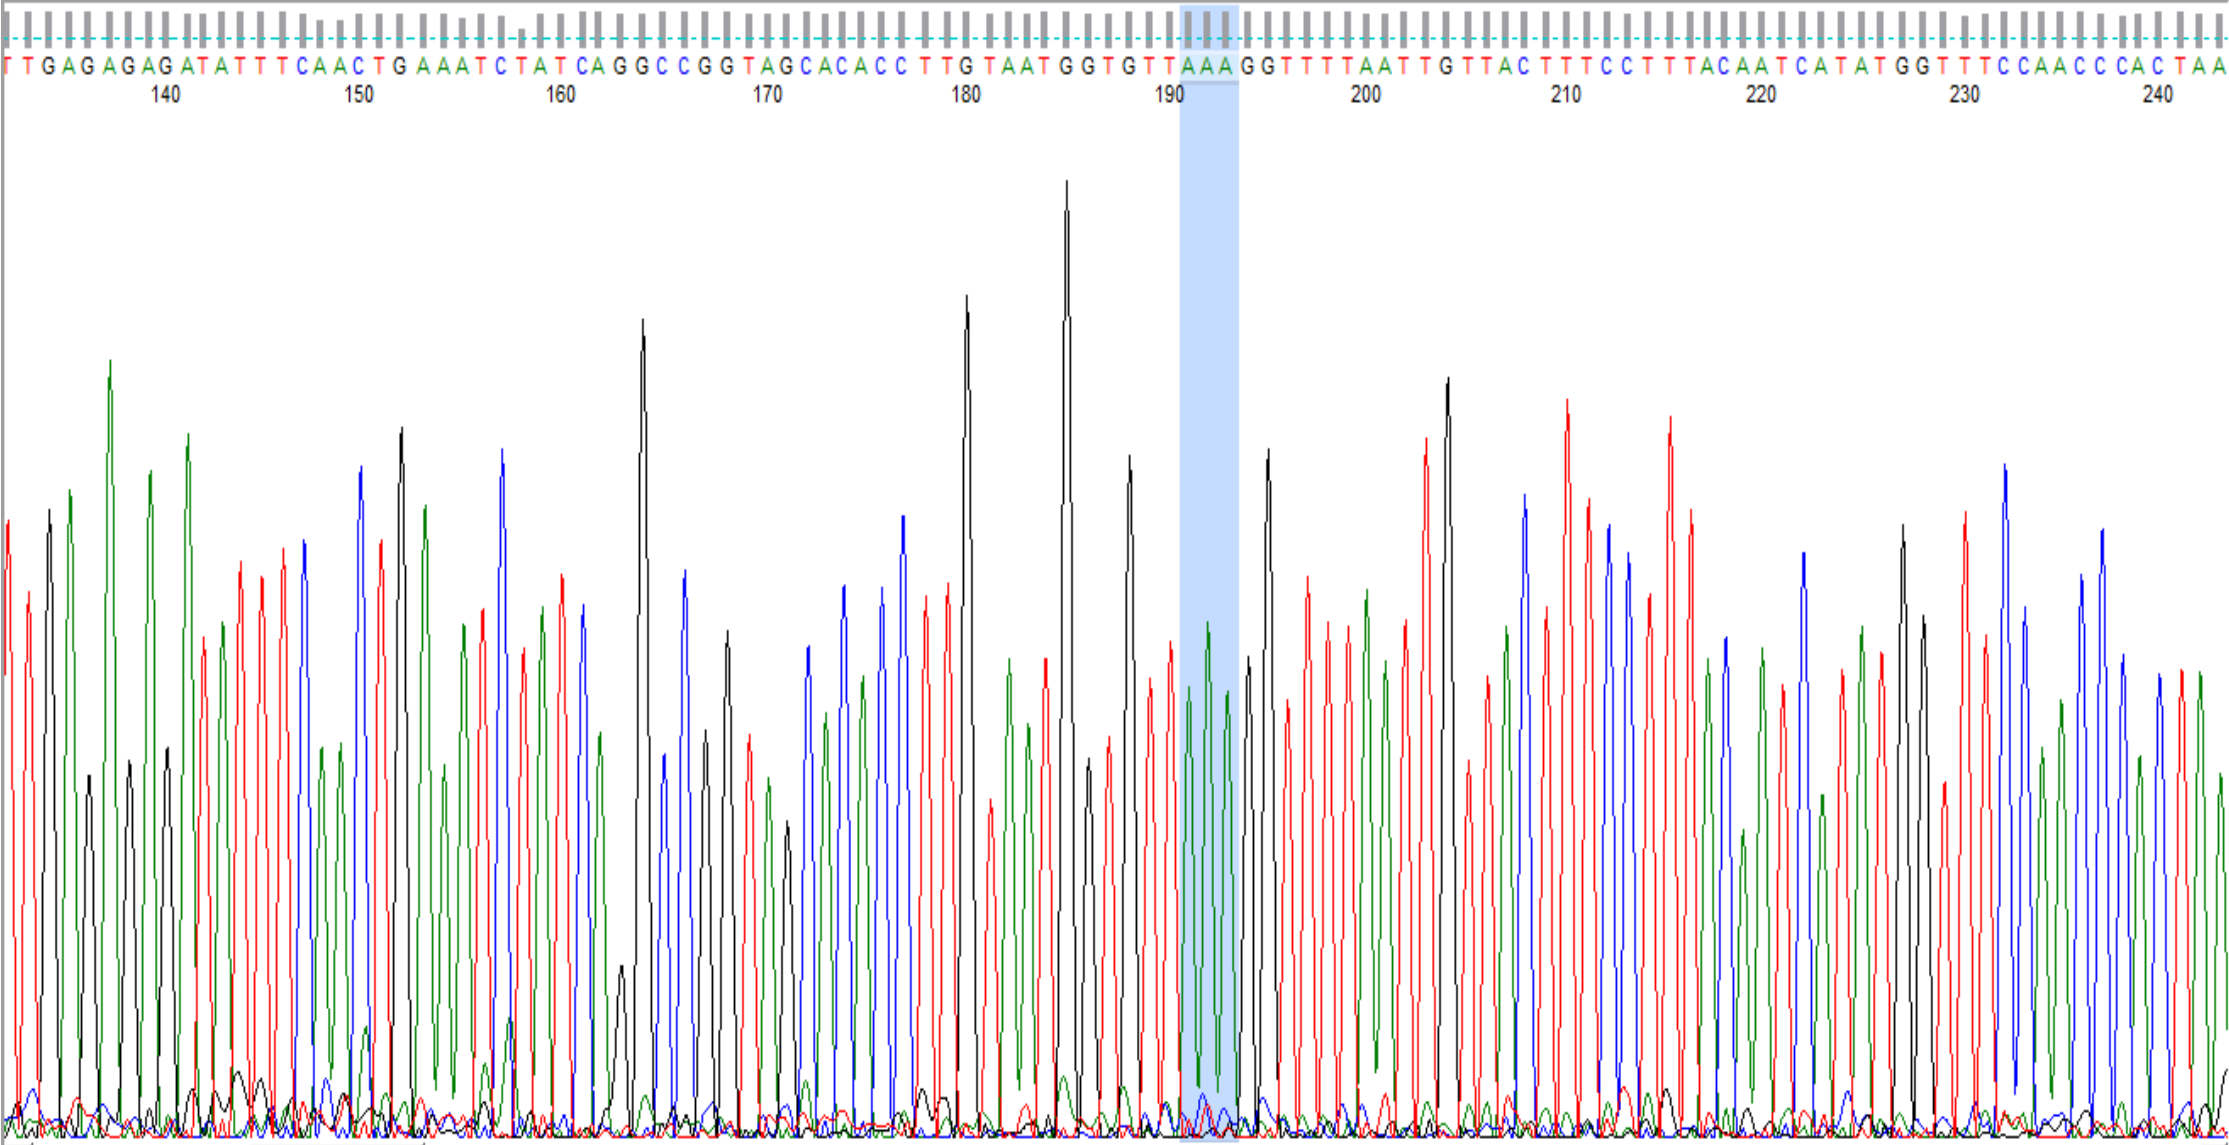

Supplement: DataSheet_1.pdf [file DataSheet_1.pdf]
